# Supplementary material for: Maize near-isogenic lines with enhanced flavonoids alleviated dextran sodium sulfate-induced murine colitis via modulation of the gut microbiota
Source: Royal Society of Chemistry journal article supplement (doi:10.1039/d3fo02953k), 2023-01-01
Supplement: d3fo02953k1.pdf [file d3fo02953k1.pdf]

Table S1. Conventional group experiment animal daily food intake after DSS induction

| Days after DSS induction | 0                    | 1     | 2     | 3    | 4     | 5    |
|--------------------------|----------------------|-------|-------|------|-------|------|
| Treatment groups         | Food intake (g)/cage |       |       |      |       |      |
| Control                  | 10.26                | 14.82 | 10.53 | 9.66 | 10.15 | 7.94 |
| DSS                      | 11.02                | 13.98 | 6.43  | 4.26 | 2.33  | 0.86 |
| A                        | 10.64                | 13.96 | 8.02  | 8.29 | 6.94  | 4.84 |
| B                        | 11.11                | 13.12 | 8.49  | 9.04 | 6.60  | 5.22 |
| C                        | 10.42                | 12.33 | 7.53  | 8.83 | 5.86  | 4.15 |
| D                        | 10.55                | 12.59 | 9.24  | 9.14 | 7.03  | 5.01 |

Table S2. Conventional group experiment animal daily water intake after DSS induction

| Days after DSS induction | 0                     | 1     | 2     | 3     | 4     | 5     |
|--------------------------|-----------------------|-------|-------|-------|-------|-------|
| Treatment groups         | Water intake (g)/cage |       |       |       |       |       |
| Control                  | 13.49                 | 28.95 | 14.87 | 13.38 | 12.56 | 14.44 |
| DSS                      | 17.65                 | 27.65 | 20.83 | 14.55 | 14.07 | 17.67 |
| A                        | 11.19                 | 22.37 | 18.60 | 14.30 | 12.22 | 10.25 |
| B                        | 12.53                 | 26.09 | 21.95 | 17.78 | 13.63 | 10.65 |
| C                        | 12.73                 | 23.03 | 17.49 | 16.04 | 11.47 | 10.71 |
| D                        | 12.87                 | 22.73 | 18.07 | 16.55 | 12.43 | 8.11  |

Table S3. Antibiotics group experiment animal food intake after DSS induction

| Days after DSS induction | 3                    | 5    |
|--------------------------|----------------------|------|
| Treatment groups         | Food intake (g)/cage |      |
| Control                  | 10.36                | 7.33 |
| DSS                      | 10.43                | 3.74 |
| A                        | 10.98                | 5.65 |
| B                        | 8.94                 | 3.81 |
| C                        | 9.53                 | 5.08 |
| D                        | 8.82                 | 4.93 |

Table S4. Antibiotics group experiment animal water intake after DSS induction

| Days after DSS induction | 3                     | 5     |
|--------------------------|-----------------------|-------|
| Treatment groups         | Water intake (g)/cage |       |
| Control                  | 16.72                 | 14.90 |
| DSS                      | 20.49                 | 12.54 |
| A                        | 15.12                 | 11.47 |
| B                        | 14.20                 | 11.11 |
| C                        | 16.00                 | 12.04 |
| D                        | 15.92                 | 14.48 |

Table S5. Conventional group experiment colon histology score

| Category | Mucosal hyperplasia | Epithelial cell death | mono-nuclear infiltrate | PMN infiltrate | eosinophils | crypt architectural distortion/death | submucosa involvement | Sum   |
|----------|---------------------|-----------------------|-------------------------|----------------|-------------|--------------------------------------|-----------------------|-------|
| DSS      | 0.00                | 2.29                  | 1.86                    | 2.57           | 0.14        | 2.57                                 | 2.14                  | 11.57 |
| Control  | 0.00                | 1.29                  | 0.29                    | 0.00           | 0.00        | 0.14                                 | 0.00                  | 1.71  |
| A        | 0.00                | 1.29                  | 0.86                    | 1.43           | 0.43        | 1.14                                 | 0.86                  | 6.00  |
| B        | 0.00                | 1.57                  | 1.00                    | 1.71           | 0.14        | 2.00                                 | 1.00                  | 7.43  |
| C        | 0.00                | 0.86                  | 0.14                    | 0.43           | 0.00        | 0.43                                 | 0.14                  | 2.00  |
| D        | 0.00                | 0.29                  | 0.29                    | 0.57           | 0.14        | 0.71                                 | 0.29                  | 2.29  |

Table S6. Antibiotics group experiment colon histology score

| Category | Mucosal hyperplasia | Epithelial cell death | mono-nuclear infiltrate | PMN infiltrate | eosinophils | crypt architectural distortion/death | submucosa involvement | Sum  |
|----------|---------------------|-----------------------|-------------------------|----------------|-------------|--------------------------------------|-----------------------|------|
| DSS      | 0.00                | 1.71                  | 0.71                    | 1.43           | 0.14        | 2.14                                 | 0.71                  | 6.86 |
| Control  | 0.00                | 1.00                  | 0.17                    | 0.00           | 0.00        | 0.17                                 | 0.00                  | 1.33 |
| A        | 0.00                | 1.43                  | 0.43                    | 0.86           | 0.00        | 1.29                                 | 0.29                  | 4.29 |
| B        | 0.00                | 1.43                  | 0.43                    | 0.86           | 0.00        | 2.00                                 | 0.86                  | 5.57 |
| C        | 0.00                | 1.57                  | 0.29                    | 0.43           | 0.29        | 2.00                                 | 0.29                  | 4.86 |
| D        | 0.00                | 0.71                  | 0.43                    | 0.43           | 0.29        | 0.43                                 | 0.43                  | 2.71 |
